# Supplementary material for: Earth system science applications of next-generation SEM-EDS automated mineral mapping
Source: Frontiers journal article supplement (doi:10.3389/feart.2022.956912), 2022-11-23
Supplement: Table_1.XLSX [file Table_1.XLSX]

## Sheet: Supplementary Table 1
Supplementary Table 1. Mineralogy data of XRD and SEM-EDS mineral mapping (three mineral per pixel mode)
samples	Quartz		Orthoclase		Plagioclase		Muscovite		Illite		Chlorite		Smectite		Dolomite		Ankerite		Apatite		Pyrite
	XRD	SEM-EDS	XRD	SEM-EDS	XRD	SEM-EDS	XRD	SEM-EDS	XRD	SEM-EDS	XRD	SEM-EDS	XRD	SEM-EDS	XRD	SEM-EDS	XRD	SEM-EDS	XRD	SEM-EDS	XRD	SEM-EDS
Qlk3	65.4	62.59	12.3	10.13	5	6.49	0	0.04	16.9	16.79	0.4	0	0	0	0	0	0	0	0	0	0	0.01
Qlk6	38.6	37.97	5.5	7.38	11.5	10.64	0.4	0.42	0	0	2.4	4.4	2.4	2.65	20.2	17.54	1.7	2.5	15.5	13.76	1.8	2.49
Qlk7_1	38.4	40.62	3.4	5.08	5.3	4.79	1.6	1.24	0	0	14.3	13.04	13	11.85	17.3	16.89	1.6	2.11	2.8	1.93	2.2	2.19
Qlk7_1	38.4	25.24	3.4	5.15	5.3	4.25	1.6	1.86	0	0	14.3	12.84	13	14.79	17.3	23.95	1.6	3.01	2.8	4.64	2.2	3.67
Qlk16_1	16	16.53	16.6	18.27	16.8	14.82	1.7	0.56	0	0	2.3	1.74	2	1.95	32.4	31.88	2.2	1.26	5.2	5.57	4.6	6.6
Qlk10	36	34.68	7	6.47	3.8	4.41	0.7	0.67	0	0	5.1	6.66	7.5	9.28	27.2	26.12	3	1.96	7.9	7.15	1.8	2.25
SX2_1	17.3	15.19	10	9.5	9.1	8.54	2	1.66	0	0	0	0	18.9	17.98	32.5	39.17	4.8	4.42	0.9	0.92	4.2	2.14
SX2_2	17.3	16.39	10	11.56	9.1	9.09	2	1.66	0	0	0	0	18.9	17.56	32.5	35.03	4.8	3.76	0.9	1.18	4.2	3.46
SX3	15.4	14.6	0.9	1.03	2.1	1.19	0	0.26	0	0	3.1	3.86	7	8.84	67.3	65.91	2.5	3.09	0.7	0.21	1	0.91
SX4	23.2	24.95	3.7	5.09	4.2	5.46	0	0.19	0	0	2	1.86	4.1	3.2	49.7	47.52	2.8	1.99	8.3	7.64	2	1.81
SX5	30.9	31.93	8.1	9.61	7.4	8.61	0.8	0.34	0	0	4	3.57	4.5	3.44	37.1	35.04	3	2.12	2.4	2.64	1.8	2.4
SX9_1	24.5	19.5	2.1	1.97	2.5	2.5	0.3	0.45	0	0	0.7	8.53	12.8	8.76	51.8	52.04	3.2	3.52	1.1	0.86	1	1.62
SX9_2	24.5	25.62	2.1	2.97	2.5	2.86	0.3	0	0	0	0.7	0	12.8	13.83	51.8	49.12	3.2	3.19	1.1	0.68	1	1.57
SX12	22.4	19.79	7.8	8.57	7.3	8.38	0.5	0.41	0	0	5.3	5.11	6.9	8.16	42.3	41.11	2.6	2.29	1.8	2.73	3.1	3.09
SX13	10.9	12.08	0.4	0	1.2	0	0	0	0	0	1.2	1.92	4.3	3.97	73.3	75.32	3.1	2.25	0.6	0.32	4.6	4.06
SX14	11.8	3.82	0.8	0.65	1.4	0.83	0	0.09	0	0	1.2	0.62	5.1	16.73	73.6	72.18	2.3	2.36	2.7	1.84	0.6	0.8
SX18	13.2	10.69	7.8	7.7	2.7	3.95	1.4	1.73	0	0	5.9	6.07	21.8	22.16	41	40.99	3	2.71	1.3	1.7	1.8	2.06
SX22_1	8.1	7.89	10.9	11.37	4.6	4.29	1.9	2.13	0.5	0	0	0	31	31.25	36.6	34.54	2.7	2.1	2.3	3.63	1.4	2.4
SX22_2	8.1	6.68	10.9	9.96	4.6	3.49	1.9	2.21	0.5	0	0	0	31	32.16	36.6	35.17	2.7	2.11	2.3	5.69	1.4	2.15
SX24	12.3	11.57	0.4	0.92	0.9	1.23	0.5	0.16	0	0	1.2	2.04	5.8	7.03	68	65.93	3.7	2.99	6.9	7.23	0.3	0.85
max	65.4	62.59	16.6	18.27	16.8	14.82	2	2.21	16.9	16.79	14.3	13.04	31	32.16	73.6	75.32	4.8	4.42	15.5	13.76	4.6	6.6
min	8.1	3.82	0.4	0	0.9	0	0	0	0	0	0	0	0	0	0	0	0	0	0	0	0	0.01
Data from Rafiei et al (2020)
Samples	Quartz		K-Feldspar		Albite		Muscovite		Illite		Chlorite		Kaolinite		Calcite		Dolomite		Hematite
	XRD	SEM-EDS	XRD	SEM-EDS	XRD	SEM-EDS	XRD	SEM-EDS	XRD	SEM-EDS	XRD	SEM-EDS	XRD	SEM-EDS	XRD	SEM-EDS	XRD	SEM-EDS	XRD	SEM-EDS
Enorama_35	44	43	11	14	14	14	3	5	9	8	15	16	2	0	1	0	0	0	0	0
Brachina_25	30	29	5	6	16	12	14	17	22	20	7	7	1	1	3	3	0	3	2	2
Brachina_39	37	32	5	7	24	21	7	9	11	12	14	17	2	2	0	0	0	0	0	0
Bunyeroo_08	38	33	1	1	3	1	9	11	45	45	0	0	1	3	0	0	0	0	2	6
Bunyeroo_10	33	30	2	3	3	1	13	14	36	38	5	4	2	2	0	0	0	0	5	8
Bunyeroo_15	36	34	2	3	1	1	16	14	34	35	0	0	6	6	0	0	0	0	4	7
sample description
Qlk3	laminated black shale. The hand sample is soft and fragile without carbonate fraction
Qlk6	laminated calcareous shale with pyrite grains visible on hand sample
Qlk7	partially laminated shale. The laminated area and non-laminated area can be distinguished in hand sample.
Qlk16	non-laminated calcareous shale with pyrite grains visible on hand sample. There are thin quartz veins verticle to beddings
Qlk10	laminated calcareous shale with phosphate nodules
SX2	non-laminated calcareous shale with pyrite.
SX3	non-laminated shaly dolostone with pyrite.
SX4	non-laminated shaly dolostone with pyrite and chert nodules. Quartz veins of 2 directions can be seen on hand sample.
SX5	non-laminated calcareous shale with quartz veins of 2 directions.
SX9	laminated shaly dolostone.
SX12	non-laminated calcareous shale with pyrite.
SX13	shaly dolostone with carbonate veins.
SX14	shaly dolostone with quartz veins cut through. The upper part shows darker black color than the lower part. Laminae can be found at the boundary. A 1.5*0.8 chert nodule can be seen on the surface.
SX18	non-laminated calcareous shale with quartz veins
SX22	non-laminated calcareous shale.
SX24	non-laminated calcareous shale.

## Sheet: Supplementary Table 2
Supplementary Table 2: Mineral recipes and parameters used for SEM-EDS measurements and classification.
Parameters	Resolution	Acquisition time	Counts		Dwell
	2048*2048	8 ms	~ 4000		2 μm
	X ray spacing	Unclassified threshold	Max mineral per pixel		BSE threshold
	2 μm	0.9	3 or 1		0.1
Mineral recipe of this study	Carbonate	Clay minerals	Silicates		Other minerals
	Calcite	Muscovite	Quartz		Apatite
	Dolomite	Kaolinite	Orthoclase		Pyrite
	Ankerite	Illite	Plagioclase		Rutile
	Magnesite	Chlorite	Zircon		Barite
		Smectites			Fluorite
		I/S interstratified
Mineral recipe of Rafiei et al 2020	Carbonate	Clay minerals	Silicates		Other minerals
	Calcite	Muscovite	Quartz		Apatite
	Dolomite	Kaolinite	Orthoclase		Pyrite
	Ankerite	Illite	Plagioclase		Rutile
	Magnesite	Chlorite	Zircon		Barite
	Siderite	I/S interstratified	Titanite		Monazite
					Xenotime
					Sphalerite
					Hematite
					Goethite
					Ilmenite
					Anhydrite

## Sheet: Supplementary Table 3
Supplementary Table 3. Mineralogy data of XRD and SEM-EDS mineral mapping (one mineral per pixel mode)
Samples	quartz		smectite		dolomite		orthoclase		plagioclase		apatite		pyrite		ankerite		chlorite		Muscovite
	XRD	SEM-EDS	XRD	SEM-EDS	XRD	SEM-EDS	XRD	SEM-EDS	XRD	SEM-EDS	XRD	SEM-EDS	XRD	SEM-EDS	XRD	SEM-EDS	XRD	SEM-EDS	XRD	SEM-EDS
SX2_1	17.3	25.84	18.9	5.33	32.5	42.8	10	8.31	9.1	10.86	0.9	0.36	4.2	2.57	4.8	2.93	0	0.59	2	0.16
SX2_2	17.3	27.04	18.9	5.07	32.5	37.18	10	11.1	9.1	11.86	0.9	0.41	4.2	4.06	4.8	2.36	0	0.63	2	0.14
SX3	15.4	18.85	7	4.13	67.3	72.15	0.9	0.81	2.1	1.33	0.7	0.05	1	1.03	2.5	1.01	3.1	0.54	0	0.04
SX4	23.2	31.72	4.1	0.48	49.7	44.84	3.7	4.89	4.2	6.66	8.3	8.22	2	1.9	2.8	0.9	2	0.16	0	0.1
SX5	30.9	42.05	4.5	1.07	37.1	29.62	8.1	9.58	7.4	11.45	2.4	2.43	1.8	2.42	3	0.66	4	0.37	0.8	0.16
SX9	24.5	37.49	12.8	4.44	51.8	48.25	2.1	2.34	2.5	3.64	1.1	0.6	1	1.55	3.2	0.83	0.7	0.79	0.3	0
SX9	24.5	27.23	12.8	6.37	51.8	56.28	2.1	1.91	2.5	3.55	1.1	0.69	1	1.67	3.2	0.86	0.7	1.23	0.3	0.07
SX12	22.4	27.45	6.9	2.68	42.3	42.63	7.8	8.98	7.3	10.89	1.8	2.55	3.1	3.35	2.6	0.74	5.3	0.34	0.5	0.18
SX13	10.9	13.93	4.3	0.75	73.3	79.22	0.4	0	1.2	0	0.6	0.11	4.6	4.82	3.1	0.78	1.2	0.32	0	0
SX14	11.8	4.43	5.1	8.91	73.6	82.08	0.8	0.47	1.4	1.01	2.7	1.42	0.6	0.94	2.3	0.58	1.2	0.1	0	0.04
SX18	13.2	15.05	21.8	19.33	41	47.58	7.8	7.03	2.7	5.51	1.3	1.39	1.8	2.61	3	0.28	5.9	0.87	1.4	0.19
SX22_1	8.1	14.14	31	23.53	36.6	34.5	10.9	10.77	4.6	7.68	2.3	4.69	1.4	3.21	2.7	0.15	0	0.76	1.9	0.34
SX22_2	8.1	11.51	31	26.02	36.6	35.92	10.9	8.92	4.6	6.13	2.3	7.15	1.4	3.01	2.7	0.14	0	0.56	1.9	0.41
SX24	12.3	13.25	5.8	2.42	68	71.89	0.4	0.78	0.9	1.37	6.9	7.6	0.3	0.99	3.7	1.19	1.2	0.42	0.5	0.07
Qlk3	65.4	63.05	0	0	0	0	12.3	16.75	5	14.7	0	0	0	0	0	0	0.4	0	0	0.03
Qlk6	38.6	47.72	2.4	0.66	20.2	16.69	5.5	7.54	11.5	13.55	15.5	8.55	1.8	2.67	1.7	1.88	2.4	0.4	0.4	0.19
Qlk7_1	38.4	54.3	13	12.25	17.3	16.45	3.4	4.48	5.3	5.97	2.8	1.91	2.2	2.28	1.6	1.06	14.3	1.07	1.6	0.13
Qlk7_2	38.4	37.89	13	15.42	17.3	26.4	3.4	4.53	5.3	5.88	2.8	1.68	2.2	4.47	1.6	1.65	14.3	1.55	1.6	0.23
Qlk10	36	47.93	7.5	5.49	27.2	21.88	7	6.69	3.8	6.01	7.9	8.3	1.8	2.39	3	0.4	5.1	0.54	0.7	0.16
Qlk16_1	16	20.63	2	0.14	32.4	27.12	16.6	19.51	16.8	18.53	5.2	5.42	4.6	7.23	2.2	0.54	2.3	0.12	1.7	0.4
min	8.1	4.43	0	0	0	0	0.4	0	0.9	0	0	0	0	0	0	0	0	0	0	0
max	65.4	63.05	31	26.02	73.6	82.08	16.6	19.51	16.8	18.53	15.5	8.55	4.6	7.23	4.8	2.93	14.3	1.55	2	0.41
aver	23.635	29.075	11.14	7.2245	40.425	41.674	6.205	6.7695	5.365	7.329	3.375	3.1765	2.05	2.6585	2.725	0.947	3.205	0.568	0.88	0.152
